# Supplementary material for: SERS as a tool for in vitro toxicology
Source: Royal Society of Chemistry journal article supplement (doi:10.1039/c5fd00216h), 2016-01-01
Supplement: c5fd00216h1.pdf [file c5fd00216h1.pdf]

## Supplementary Information

### SERS as a tool for *in vitro* toxicology

Kate M. Fisher, Jennifer A. McLeish, Lauren Jamieson, Jing Jiang, James Hopgood, Stephen McLaughlin, Ken Donaldson, Colin J. Campbell

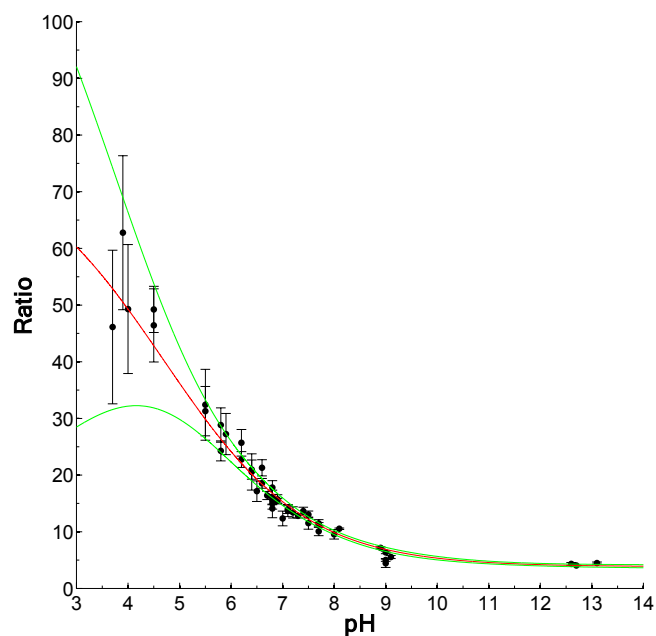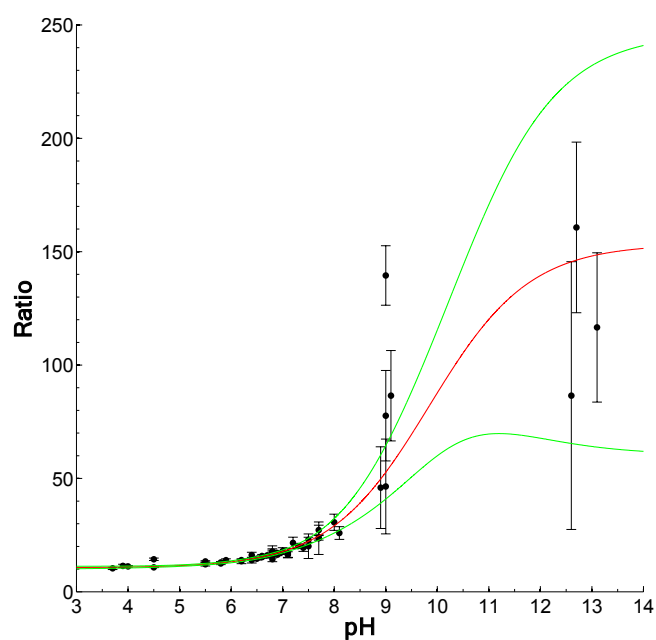

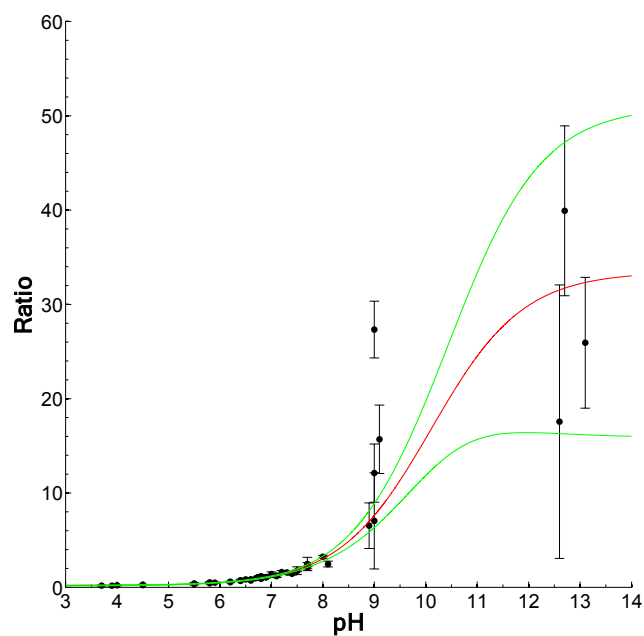

**Figure S1: Variation of 1590/1400 (top), 1590/1700 (middle) and 1400/1700 (bottom) peak height ratios with pH. A Boltzmann curve (red line) has been fitted to points which are the weighted means from three independent datasets; error bars are the standard deviation of the weighted mean; green lines are the 95% non-simultaneous confidence bands.**

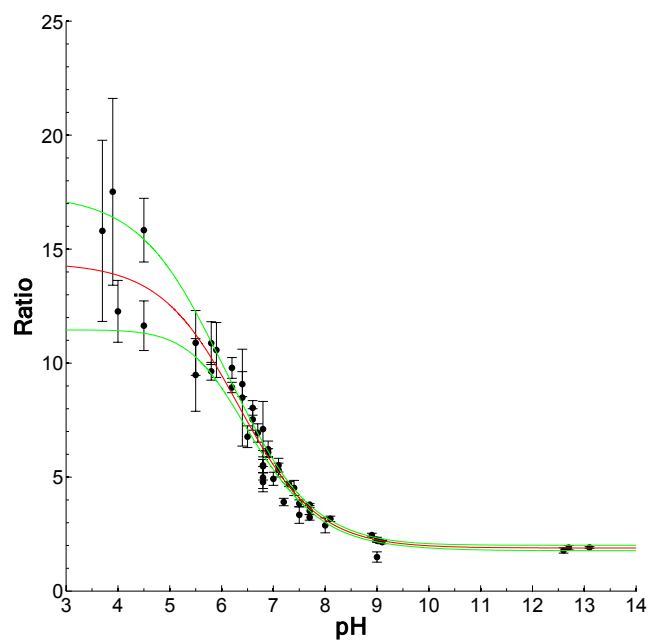

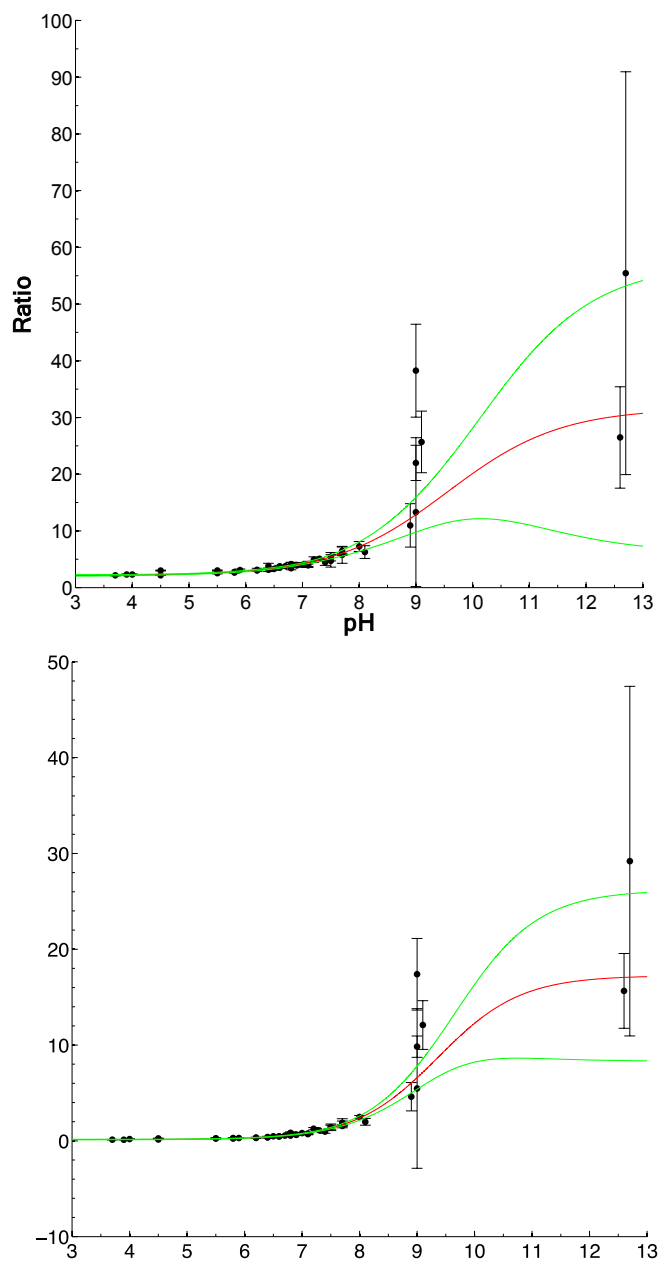

**Figure S2: Variation of 1590/1400 (top), 1590/1700 (middle) and 1400/1700 (bottom) peak areas ratios with pH. A Boltzmann curve (red line) has been fitted to points which are the weighted means from three independent datasets; error bars are the standard deviation of the weighted mean; green lines are the 95% non-simultaneous confidence bands.**
